# Supplementary material for: A microscopic survey on microplastics in beverages: the case of beer, mineral water and tea
Source: Royal Society of Chemistry journal article supplement (doi:10.1039/d2an00083k), 2022-01-01
Supplement: d2an00083k1.pdf [file d2an00083k1.pdf]

*Supporting Information for*

**A microscopic survey on microplastics in beverages: the case of beers, mineral water and tea**

Yinan Li,<sup>a,†</sup> Lin Peng,<sup>a,†</sup> Jianxin Fu,<sup>a</sup> Xueli Dai,<sup>a</sup> and Guoqing Wang<sup>a,b</sup>

*<sup>a</sup>College of Food Science and Engineering, Ocean University of China, 5 Yushan Road, Qingdao 266003, China*

*<sup>b</sup>Laboratory for Marine Drugs and Bioproducts of Qingdao National Laboratory for Marine Science and Technology, Qingdao 266237, China*

*<sup>†</sup>The authors contributed equally.*

**Table S1** The relevant information of the beers, bottled mineral water and tea leaves studied in the present work.

| Beverage name                      | Country of origin | Quantity | Number of microparticles* |             | Composition identified |
|------------------------------------|-------------------|----------|---------------------------|-------------|------------------------|
|                                    |                   |          | Fibrous                   | Fragmentary |                        |
| Corona extra                       | Mexico            | 355 mL   | 363.6                     | 1416.2      | PP                     |
| Hoggy's apple paradise             | Estonia           | 330 mL   | 1535.3                    | 5800.0      | PP                     |
| Peanut butter chocolate milk stout | United States     | 355 mL   | 787.9                     | 1113.1      |                        |
| Heineken                           | France            | 330 mL   | 626.2                     | 2587.9      |                        |
| Qingdao Beer                       | China             | 500mL    | 1252.5                    | 4244.4      |                        |
| Schneider weisse                   | Germany           | 500 mL   | 60.6                      | 7618.2      |                        |
| Tempt 7                            | Denmark           | 330mL    | 282.8                     | 929.3       |                        |
| Mc cabee apple flavored beer       | Israel            | 330 mL   | 1979.8                    | 4830.3      |                        |
| Bavaria                            | Holland           | 330 mL   | 565.6                     | 2688.9      |                        |
| The legend lager                   | South Africa      | 330 mL   | 1252.5                    | 1214.1      |                        |
| Moofee                             | Belgium           | 330 mL   | 80.8                      | 4264.6      |                        |
| Primator weizen                    | Czech Republic    | 500 mL   | 1030.3                    | 1032.3      | PS                     |
| Trappistes rochefort 10            | Belgium           | 330 mL   | 3010.1                    | 5072.7      | PP                     |
| Victoria bitter                    | Australia         | 375 mL   | 484.8                     | 1214.1      |                        |
| Barbarella                         | Brazil            | 330 mL   | 505.0                     | 9153.5      | PP                     |
| NF (Nongfu Spring) water           | China             | 500 mL   | 20.2                      | 890.9       |                        |
| Black tea                          | China             | 20 g     | 4300.0                    | 603.3       |                        |
| Green tea                          | China             | 20 g     | 4433.3                    | 6570.0      | PET                    |
| Dark tea                           | China             | 20 g     | 2533.3                    | 1970.0      | PE                     |
| White tea                          | China             | 20 g     | 4666.6                    | 803.3       |                        |

\*Note that the number of microplastics estimated for each beer or the mineral water indicates that found per 100 mL of beverage; while the number for each of the tea denote that found for 20 g of the tea leave.

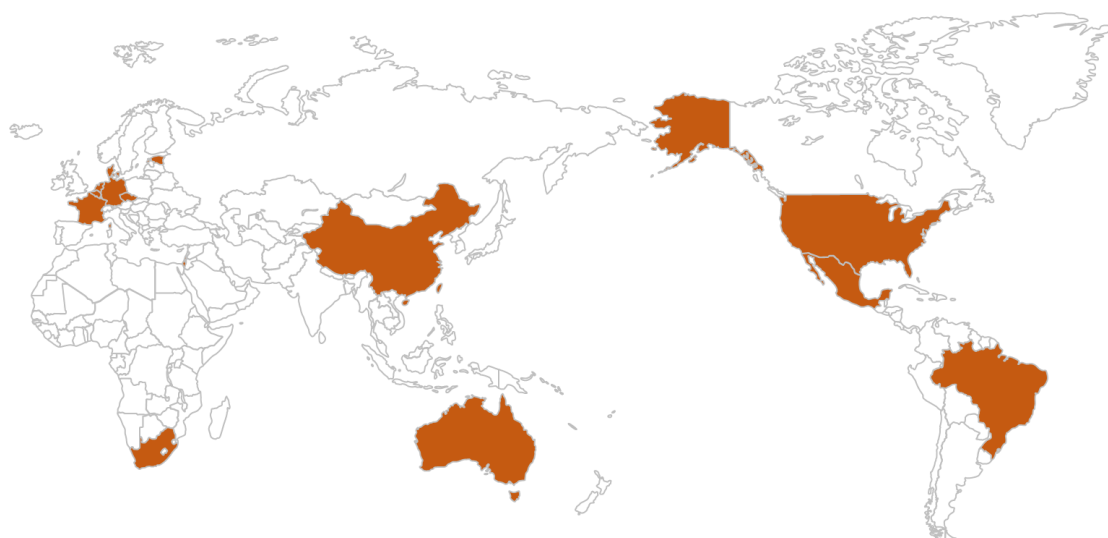

**Fig. S1** World map showing the countries and regions highlighted in orange, where the beverages studied in this work are produced.

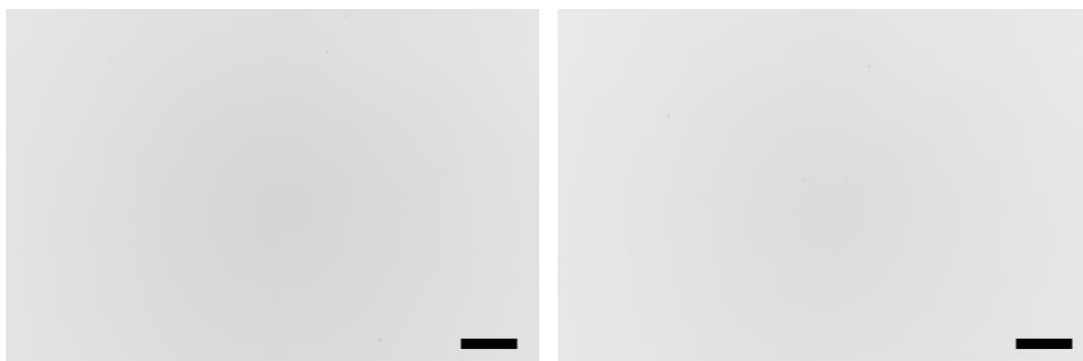

**Fig. S2** Typical bright field images for small objects observed in pure water samples as controls. Scale bar: 100  $\mu\text{m}$ .

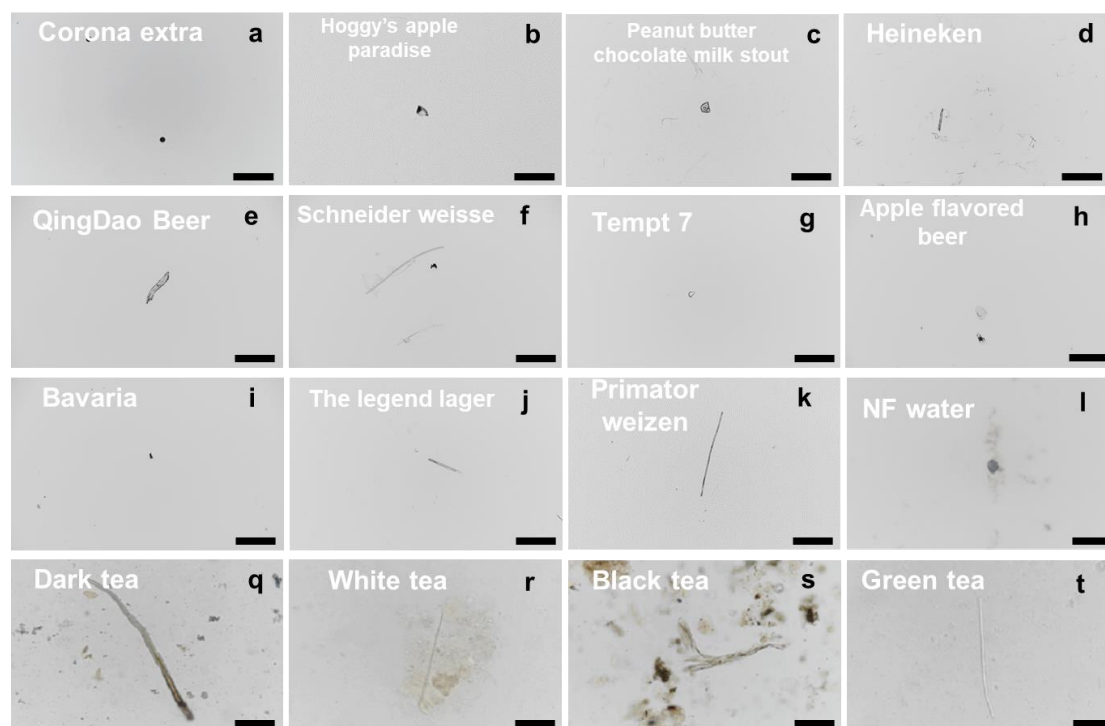

**Fig. S3** Supplementary bright field images of particles observed in the various beverages, including beers (a-k), bottled mineral water (l) and teas produced with tea-leaves (q-t). Scale bar: 100  $\mu$ m. The type of drink is depicted in the corresponding image.

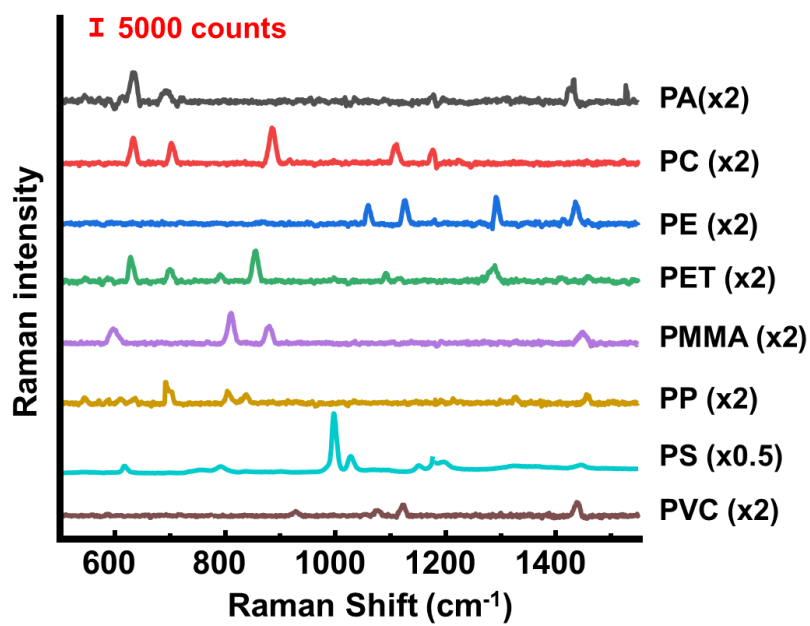

**Fig. S4** The standard Raman spectra collected from the various pure plastic powders, which are used to determine the composition of the micro-particles in the beverages.

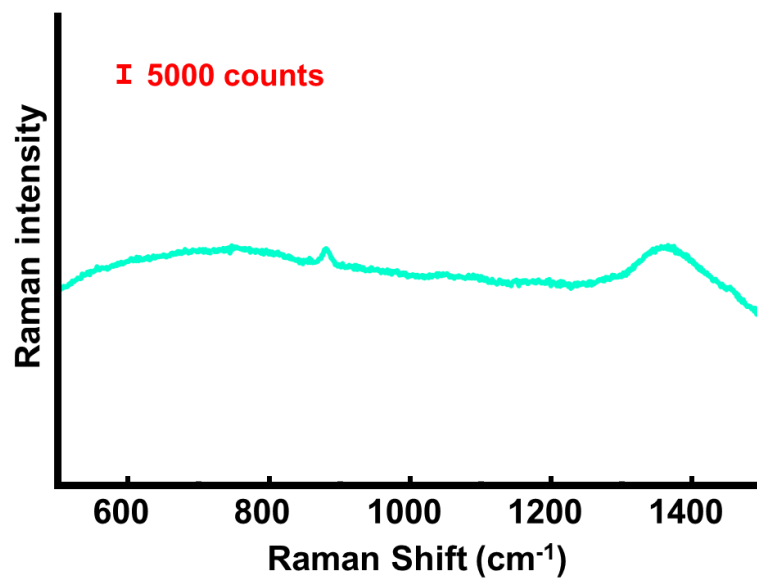

**Fig. S5** The representative Raman spectrum of the microparticles obtained from the other 10 types of beer samples, all of which have a band centered at 881 cm<sup>-1</sup>, and a broad band around 1370 cm<sup>-1</sup>.

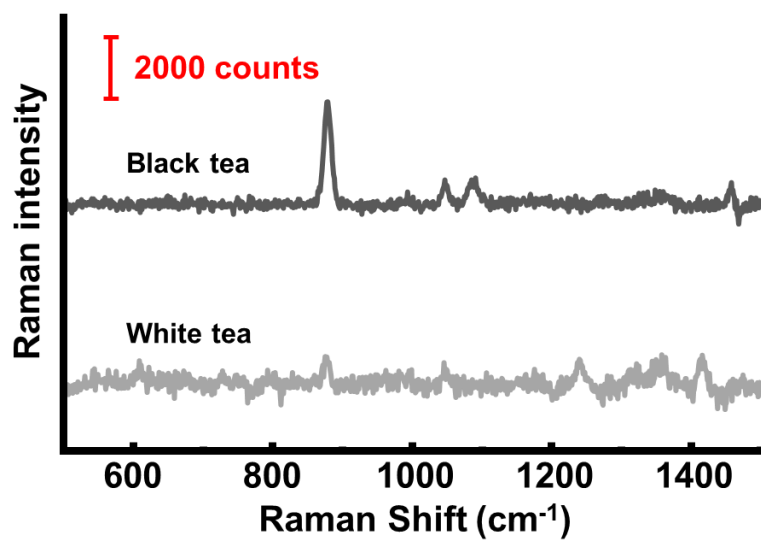

**Fig. S6** The representative Raman spectra of the microparticles extracted from black tea and white tea samples.
